# Supplementary material for: Pressure-induced stability and superconductivity in LuH12 polyhydrides
Source: Royal Society of Chemistry journal article supplement (doi:10.1039/d3cp00604b), 2023-01-01
Supplement: d3cp00604b1.pdf [file d3cp00604b1.pdf]

## Supplementary Information for the paper entitled

### *“Pressure-Induced Stability and Superconductivity in LuH<sub>12</sub> polyhydrides”*

Junyi Du<sup>†</sup>, Weiguo Sun<sup>‡</sup>, Xiaofeng Li<sup>†</sup>, Feng Peng<sup>†,\*</sup>

<sup>†</sup> *School of Mathematical Sciences, Luoyang Normal University, Luoyang 471934, China*

<sup>‡</sup> *College of Physics and Electronic Information & Henan Key Laboratory of Electromagnetic Transformation  
and Detection, Luoyang Normal University, Luoyang 471934, China*

---

\* [fpeng@calypso.cn](mailto:fpeng@calypso.cn) or [fpeng@lynu.edu.cn](mailto:fpeng@lynu.edu.cn)

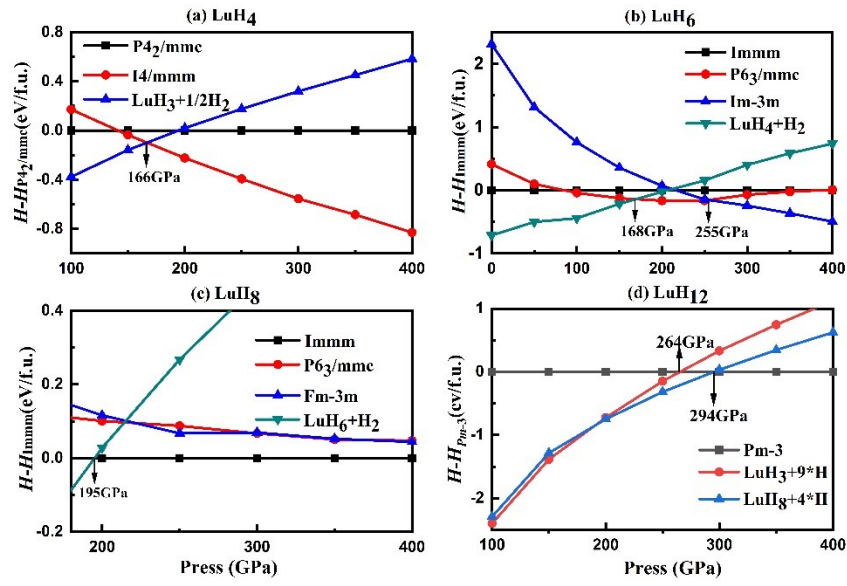

Fig.S1 The enthalpies difference of stable Lu-H compounds relative to other compounds and  $\text{H}_2$  under pressure

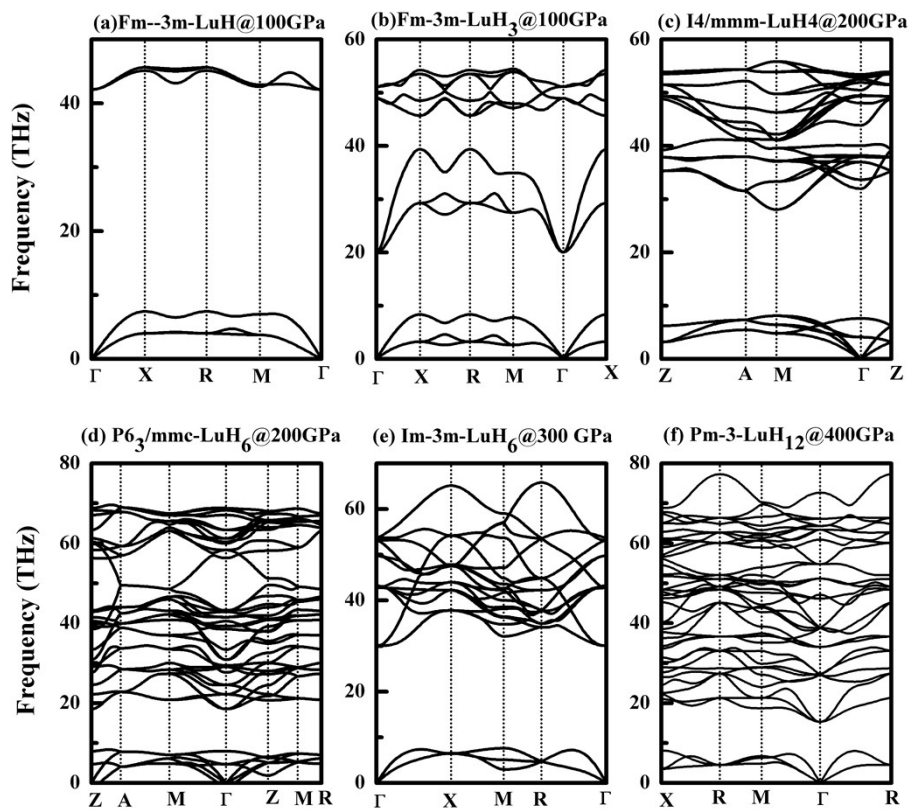

Fig.S2 The phonon dispersion curves of stable compounds.

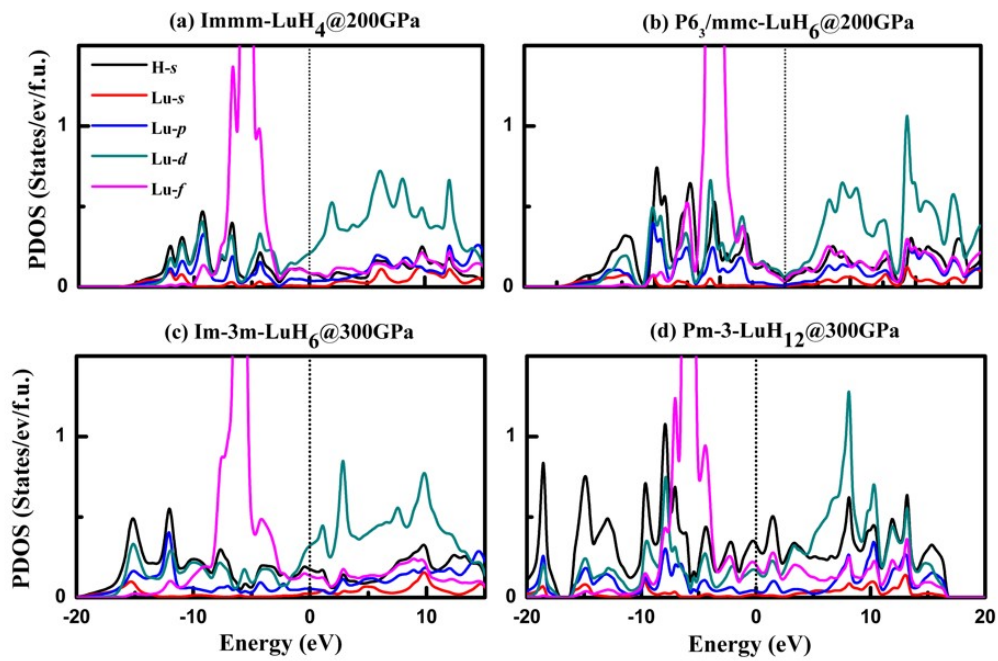

**Fig.S3** The projected density of states of LuH<sub>4</sub>, LuH<sub>6</sub> and LuH<sub>12</sub>

Table S1 The crystal parameters of predicted stable lutetium polyhydrides

|                               | Space group               | Lattice parameters(Å)                                                     | Atoms   | Atomic coordinates (fractional) |          |          |
|-------------------------------|---------------------------|---------------------------------------------------------------------------|---------|---------------------------------|----------|----------|
|                               |                           |                                                                           |         | <i>x</i>                        | <i>y</i> | <i>z</i> |
| LuH<br>(100GPa)               | <i>Fm-3m</i>              | $a=b=c=4.033$<br>$\alpha=\beta=\gamma=90^\circ$                           | Lu (4a) | 0.000                           | 0.000    | 0.000    |
|                               |                           |                                                                           | H (4a)  | 0.000                           | 0.500    | 0.000    |
| LuH <sub>3</sub><br>(100GPa)  | <i>Fm-3m</i>              | $a=b=c=4.347$<br>$\alpha=\beta=\gamma=90^\circ$                           | Lu (4a) | 0.000                           | 0.000    | 0.000    |
|                               |                           |                                                                           | H (4b)  | 0.250                           | 0.250    | 0.750    |
|                               |                           |                                                                           | H (8c)  | 0.500                           | 0.500    | 0.500    |
| LuH <sub>4</sub><br>(200GPa)  | <i>I4/mmm</i>             | $a=b=2.687$<br>$c=5.273$<br>$\alpha=\beta=\gamma=90^\circ$                | Lu (2a) | 0.000                           | 0.000    | 0.000    |
|                               |                           |                                                                           | H (4e)  | 0.000                           | 0.000    | 0.636    |
|                               |                           |                                                                           | H (4d)  | 0.500                           | 0.000    | 0.250    |
| LuH <sub>6</sub><br>(200GPa)  | <i>P6<sub>3</sub>/mmc</i> | $a=b=3.426$<br>$c=4.269$<br>$\alpha=\beta=90^\circ$<br>$\gamma=120^\circ$ | Lu (2d) | 0.333                           | 0.667    | 0.750    |
|                               |                           |                                                                           | H (12k) | 0.839                           | 0.161    | 0.875    |
| LuH <sub>6</sub><br>(300GPa)  | <i>Im-3m</i>              | $a=b=c=3.340$<br>$\alpha=\beta=\gamma=90^\circ$                           | Lu (2a) | 0.000                           | 0.000    | 0.000    |
|                               |                           |                                                                           | H (12d) | 0.000                           | 0.750    | 0.500    |
| LuH <sub>8</sub><br>(200GPa)  | <i>Immm</i>               | $a=3.151$<br>$b=3.089$<br>$c=4.398$<br>$\alpha=\beta=\gamma=90^\circ$     | Lu (2a) | 0.000                           | 0.000    | 0.000    |
|                               |                           |                                                                           | H (8l)  | 0.000                           | 0.768    | 0.393    |
|                               |                           |                                                                           | H (8m)  | 0.202                           | 0.500    | 0.156    |
| LuH <sub>12</sub><br>(300GPa) | <i>Pm-3</i>               | $a=b=c=3.012$<br>$\alpha=\beta=\gamma=90^\circ$                           | Lu (1b) | 0.500                           | 0.500    | 0.500    |
|                               |                           |                                                                           | H (12j) | 0.668                           | 0.788    | 0.000    |
